# Supplementary material
Source: HighWire-hosted journal article supplement (https://erj.ersjournals.com/content/54/4/1901900)
Supplement: inline-supplementary-material-1 [file inline-supplementary-material-1.pdf]

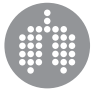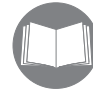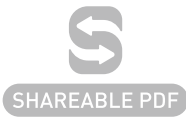

# Doubts about the adverse effects of air pollution on asthma?

Isabella Annesi-Maesano<sup>1</sup> and Francesco Forastiere<sup>2,3</sup>

**Affiliations:** <sup>1</sup>Sorbonne Université and INSERM, Institut Pierre Louis d'Epidémiologie et de Santé Publique (IPLESP UMRS 1136), Epidemiology of Allergic and Respiratory Diseases Dept (EPAR), Medical School Saint-Antoine, Paris, France. <sup>2</sup>Institute of Biomedicine and Molecular Immunology (IBIM), National Research Council, Palermo, Italy. <sup>3</sup>Environmental Research Group, King's College, London, UK.

**Correspondence:** Isabella Annesi-Maesano, Sorbonne Université and INSERM, Institut Pierre Louis d'Epidémiologie et de Santé Publique (IPLESP UMRS 1136), Epidemiology of Allergic and Respiratory Diseases Dept (EPAR), Medical School Saint-Antoine, 27, rue Chaligny, Paris Cedex 12, 75571, France.  
E-mail: [isabella.annesi-maesano@inserm.fr](mailto:isabella.annesi-maesano@inserm.fr)

 @ERSpublications  
**Efforts to reduce air pollution exposure, especially from traffic emissions, could help prevent a substantial portion of new cases of asthma** <http://bit.ly/339gGdq>

**Cite this article as:** Annesi-Maesano I, Forastiere F. Doubts about the adverse effects of air pollution on asthma? *Eur Respir J* 2019; 54: 1901900 [<https://doi.org/10.1183/13993003.01900-2019>].

This single-page version can be shared freely online.

When can a relationship between an exposure and a disease be considered “causal”? Typically, several steps need to be followed to respond to the question, such as identifying, reviewing, evaluating and integrating the scientific evidence for an overall evaluation that includes a thoughtful check of the Bradford Hill criteria [1], as illustrated in the International Agency for Research on Cancer preamble [2] or in the Environmental Protection Agency procedures [3, 4].
